# Supplementary material for: Isolation of a metal-to-ligand charge-transfer (MLCT) state of a tris 1,4-diimine complex of iron in the solid state: X-ray crystal structure and EPR
Source: Royal Society of Chemistry journal article supplement (doi:10.1039/c6nj02874h), 2016-12-21
Supplement: c6nj02874h1.pdf [file c6nj02874h1.pdf]

## Supplementary material

# Isolation of a metal-to-ligand charge-transfer (MLCT) state of a tris 1,4-diimine complex of iron in solid. X-ray crystal structure and EPR

Nirmal K. Shee, Michael G. B. Drew and Dipankar Datta\*

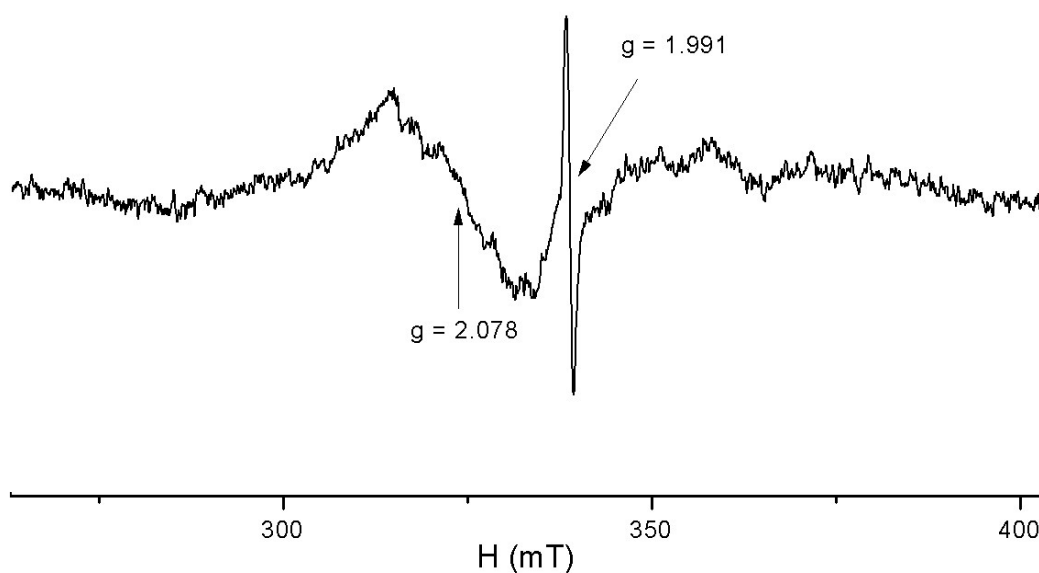

**Fig. S1** The X-band EPR spectrum of  $[\text{FeL}_3](\text{ClO}_4)_2 \cdot x\text{CH}_3\text{CN}$  in solid state at room temperature. Spectrometer settings: microwave frequency, 9.445 GHz; microwave power, 1.0 mW; modulation frequency, 100 kHz; modulation amplitude, 1 mT.

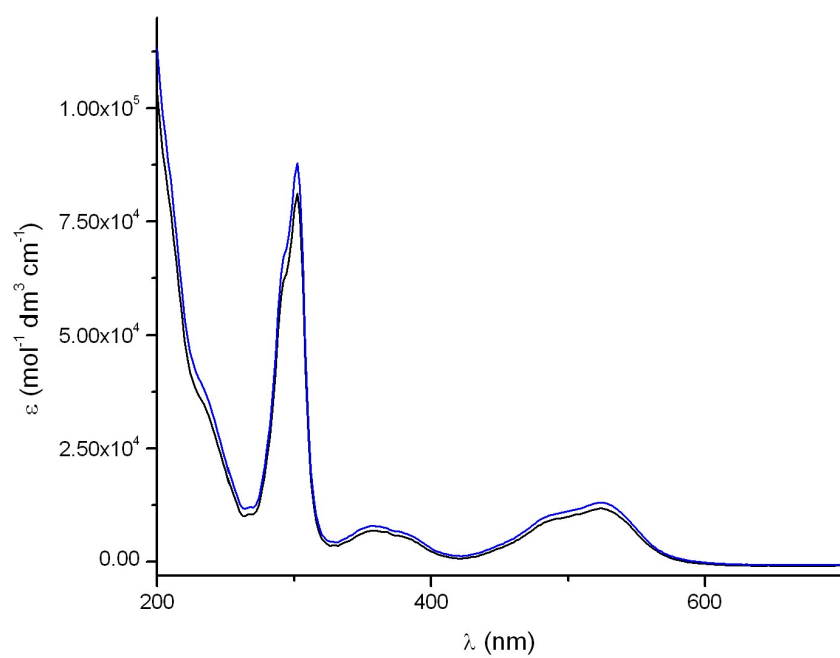

**Fig. S2** Absorption spectra of  $1 \cdot 2\text{H}_2\text{O}$  (blue) and  $1 \cdot 3\text{H}_2\text{O}$  (black) in acetonitrile in air.
